# Supplementary material for: TOMM40 RNA Transcription in Alzheimer’s Disease Brain and Its Implication in Mitochondrial Dysfunction
Source: MDPI journal article supplement (doi:10.3390/genes12060871), 2021-06-06
Supplement: s1 [file s1]

## Supplementary Figures and Tables

**Figure S1.** Allele-specific primers of *TOMM40* pseudogenes can cross-amplify other pseudogenes.

**Figure S2.** Conventional *TOMM40* cDNA assays can cross-amplify *TOMM40* pseudogenes.

**Table S1.** Primers, probes, and TaqMan assays.

**Table S2.** Fractions of *TOMM40* pseudogene *P1b/P2* RNAs and IVS9 measured RNA in total *TOMM40*-related RNA pool, measured by dPCR.

**Figure S1.** Allele-specific primers of *TOMM40* pseudogenes can cross-amplify other pseudogenes. Capillary gel electrophoresis images of the end-point PCR amplified pseudogene (PG) amplicons. The P1 primer set cross-amplified all pseudogene templates (lanes 3-5) and *TOMM40* cDNA (lane 6). The P1b/P2 primer set cross-amplified templates of P3 (lane 4) and P4 (lane 5). The P3 primer set cross-amplified templates of P1b/P2 (lane 3) and P4 (lane 5). The P4 primer set cross-amplified P1b/P2 template (lane 3). Genomic DNA (lane 1) served as a positive control and no-template control (NTC, lane 2) served as a negative control.

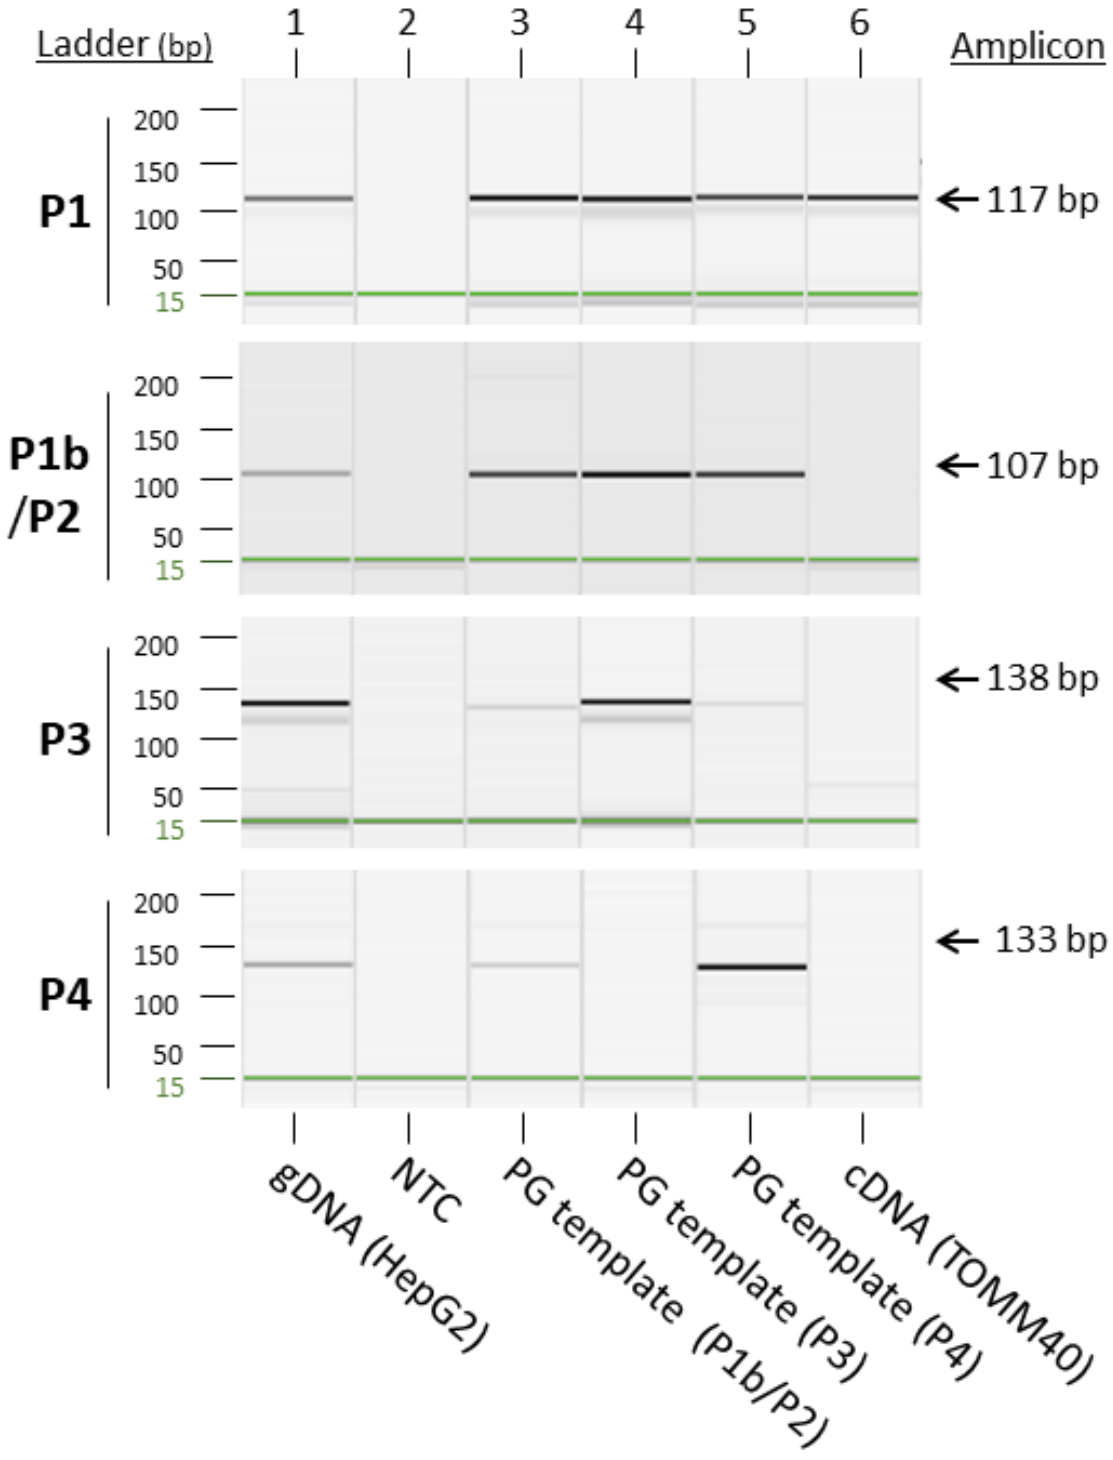

**Figure S2.** Conventional *TOMM40* cDNA assays can cross-amplify *TOMM40* pseudogenes. Capillary gel electrophoresis images of the end-point PCR amplified pseudogene (PG) amplicons. The spliced mRNA-based cDNA assays span the splicing junctions of either exons 1 and 2 (Ex1-Ex2) or exons 3 and 4 (Ex3-Ex4) of *TOMM40*. RT-PCR amplified *TOMM40* amplicons from three cell lines (HepG2, U-87, SH-SY5Y; lanes 1-3) and *TOMM40* cDNA (lane 7) are shown with the expected size. These two assays also amplified all the DNA templates of *TOMM40* pseudogenes from (lanes 4-6) with the expected size of amplicons. No-template control (NTC, lane 8) served as a negative control.

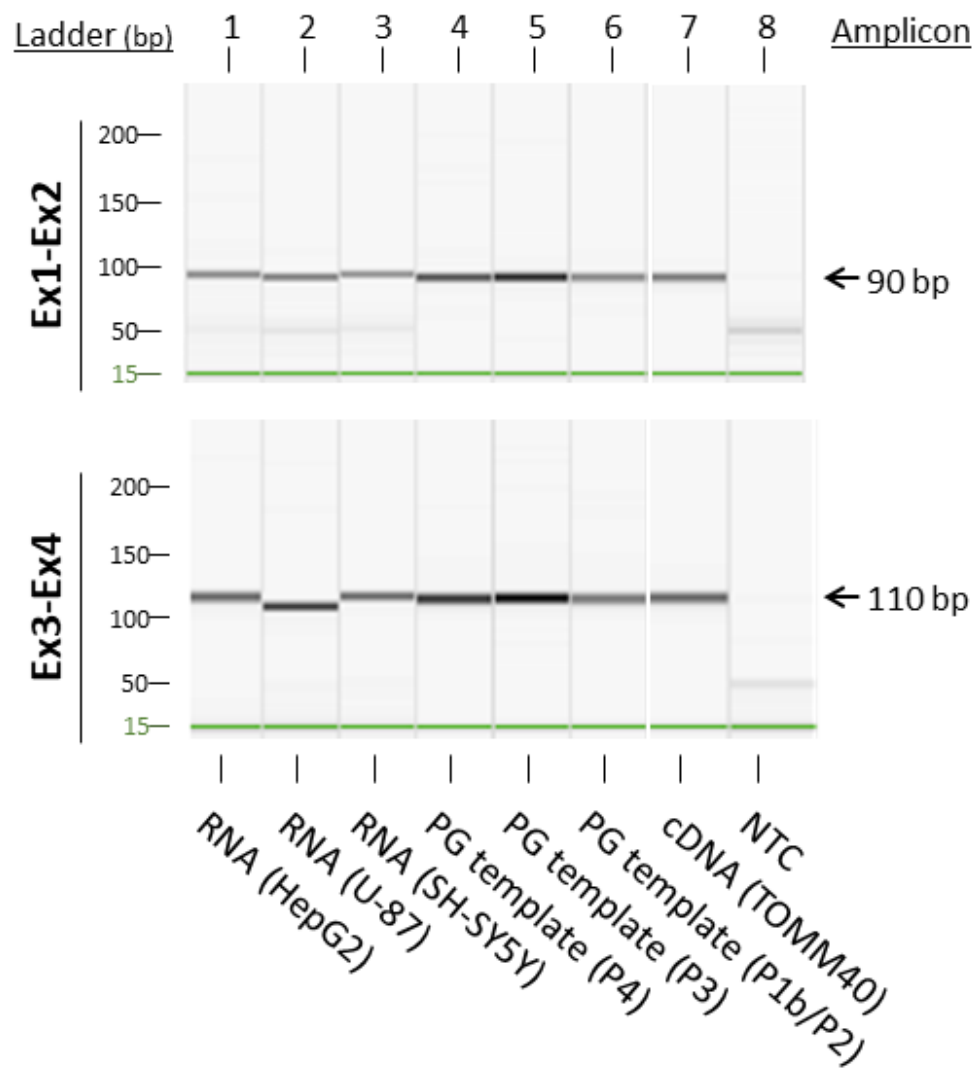

**Table S1. Primers, probes, and TaqMan assays.**

| Usage                                                   | Primer Name      | Sequence 5'-                       | Amplicon (bp) | Comment                                      |
|---------------------------------------------------------|------------------|------------------------------------|---------------|----------------------------------------------|
| <b>TOMM40 pseudogene template</b>                       |                  |                                    |               |                                              |
|                                                         | PG_P1b/P2_F1     | TAACCCAAACAAGCAAAACATTAGT          | 1901          | Forward primer for TOMM40P1b, P2, and P4     |
|                                                         | PG_P1b/P2_R1     | GAGCATTTTATCAAATTCCTTAGT           |               | Reverse primer for TOMM40P1b and P2          |
|                                                         | PG_P3_F1         | TGGACATGTCACATTAAGACAGACT          | 1887          | Forward primer for TOMM40P3                  |
|                                                         | PG_P3_R1         | TGTTCCACACTCTCTGAACATACTG          |               | Reverse primer for TOMM40P3                  |
|                                                         | PG_P4_R1         | CTAAAAGCCTTAGATAAGCATGGTG          | 1770          | Reverse primer for TOMM40P4                  |
| <b>TOMM40 pseudogene RNA</b>                            |                  |                                    |               |                                              |
|                                                         | T40-PG_P1_F1     | GAGTGCCACCGGAGGTGTAAGG             | 117           | Forward primer for TOMM40P1                  |
|                                                         | T40-PG_P1_R1     | GGCTACTGTGTGGTTACCTGG              |               | Reverse primer for TOMM40P1                  |
|                                                         | T40-PG_P1b/P2_F1 | GTTCTTGCAGTGATTCAGGAAGGC           | 107           | Forward primer for TOMM40P1b and P2          |
|                                                         | T40-PG_P1b/P2_R1 | CTCCTCTTCAAAGGCTCTGTGGATAGC        |               | Reverse primer for TOMM40P1b and P2          |
|                                                         | T40-PG_P3_F1     | TTGCTTGGCCCTGGGCAGTG               | 138           | Forward primer for TOMM40P3                  |
|                                                         | T40-PG_P3_R1     | GGGTTTGTGGTGTTATGTCCAACCC          |               | Reverse primer for TOMM40P3                  |
|                                                         | T40-PG_P4_F1     | TCCTGAACCCACGAGGACGTC              | 133           | Forward primer for TOMM40P4                  |
|                                                         | T40-PG_P4_R1     | CCTCAGGTCCAAGATGGCCATCC            |               | Reverse primer for TOMM40P4                  |
| <b>TOMM40 cDNA template</b>                             |                  |                                    |               |                                              |
|                                                         | T40_cDNA_F1      | CACGGGGTGGGAGCGGAG                 | 1275          | Forward primer                               |
|                                                         | T40_cDNA_R1      | TCCCTCCTTTCCAATGTCCC               |               | Reverse primer                               |
| <b>TOMM40 mRNA</b>                                      |                  |                                    |               |                                              |
|                                                         | T40_Ex1-Ex2_F1   | ACCATGGGGAACGTGTTGGCTGC            | 90            | Forward primer for TOMM0 Ex1-Ex2             |
|                                                         | T40_Ex1-Ex2_R1   | CGGAGTGGCGGCAGCCCCACG              |               | Reverse primer for TOMM0 Ex1-Ex2             |
|                                                         | T40_Ex3-Ex4_F1   | CAAAGGGTTGAGTAACCATTTTCAGGTCAACCAC | 110           | Forward primer for TOMM40 Ex3-Ex4            |
|                                                         | T40_Ex3-Ex4_R1   | GACTCAGCTGCTTTGTCCCCACATATGTG      |               | Reverse primer for TOMM40 Ex3-Ex4            |
|                                                         | T40_Ex4-Ex5_F1   | TCAGCACAATCGGGGAGTC                | 112           | Forward primer for TOMM0 Ex4-Ex5             |
|                                                         | T40_Ex4-Ex5_R1   | CCACTGTTGTCCATGTCACCC              |               | Reverse primer for TOMM0 Ex4-Ex5             |
|                                                         | TOMM40 TaqMan GX | N/A                                |               | Thermo Fisher (Hs01587378_mH)                |
|                                                         | ACTB TaqMan GX   | N/A                                |               | Thermo Fisher (Hs01060665_g1)                |
| <b>TOMM40 primary RNA transcript</b>                    |                  |                                    |               |                                              |
|                                                         | T40_Ex6-IVS6_F1  | CTCGTGGGTTCAAGTAAGA                | 98            | Forward primer for TOMM40 surrogate Ex6-IVS6 |
|                                                         | T40_Ex6-IVS6_R1  | AAAGGAGGTTCAAAATGGG                |               | Reverse primer for TOMM40 surrogate Ex6-IVS6 |
|                                                         | T40_Ex6-IVS6     | FAM-ATTTGCTGGCAAAGCCAGAACTGC-IBFQ  |               | Ordered from Integrated DNA Technologies     |
|                                                         | T40_IVS9_F1      | GCAGGAGCAGTGTGGTTAAA               | 85            | Forward primer for TOMM40 surrogate IVS9     |
|                                                         | T40_IVS9_R1      | CACCATATCCATGCAGAGTTCC             |               | Reverse primer for TOMM40 surrogate IVS9     |
|                                                         | T40_IVS9_Probe   | FAM-TCGGCATGTGGCTGGTATCCAA-IBFQ    |               | Ordered from Integrated DNA Technologies     |
| <b>Mitochondrial DNA copy number</b>                    |                  |                                    |               |                                              |
|                                                         | HsMt_15977_F1    | CCACCATTAGCACCCAAAGCT              | 115           | Forward primer                               |
|                                                         | HsMt_16091_R1    | TACATAGCGGTTGTTGATGGG              |               | Reverse primer                               |
| <b>Hemoglobin B for MtDNA copy number normalization</b> |                  |                                    |               |                                              |
|                                                         | HGB_F1           | TGTGCTGGCCCATCACTTTG               | 73            | Forward primer                               |
|                                                         | HGB_R1           | ACCAGCCACCACTTTCTGATAGG            |               | Reverse primer                               |

**Table S2.** Fractions of *TOMM40* pseudogene *P1b/P2* RNAs and IVS9 RNA in total *TOMM40*-related RNA pool, measured by dPCR.

| PMB_ID  | Copies/ $\mu$ l (95% Poisson confidence intervals) |               |            | % in Total <i>TOMM40</i> |      |
|---------|----------------------------------------------------|---------------|------------|--------------------------|------|
|         | Total <i>TOMM40</i>                                | <i>P1b/P2</i> | IVS9       | <i>P1b/P2</i>            | IVS9 |
| AD_1    | 55.9 (3.3)                                         | 11.6 (1.5)    | 12.2 (1.6) | 20.8                     | 21.8 |
| AD_2    | 76.7 (3.8)                                         | 15.2 (1.7)    | 11.5 (1.5) | 19.8                     | 15.0 |
| AD_3    | 201.4 (6)                                          | 22.3 (2)      | 7.9 (1.2)  | 11.1                     | 3.9  |
| AD_4    | 96.7 (4.2)                                         | 14.4 (1.6)    | 16 (1.7)   | 14.9                     | 16.5 |
| AD_5    | 145.9 (5.3)                                        | 32.9 (2.5)    | 11.6 (1.6) | 22.5                     | 8.0  |
| AD_6    | 101.8 (4.4)                                        | 16.9 (1.8)    | 16.8 (1.9) | 16.6                     | 16.5 |
| AD_7    | 205.3 (8.2)                                        | 23.6 (2.1)    | 25.2 (2.6) | 11.5                     | 12.3 |
| AD_8    | 65.8 (3.6)                                         | 7.9 (1.3)     | 18.1 (2.2) | 12.0                     | 27.5 |
| AD_9    | 107.7 (4.6)                                        | 15.7 (1.7)    | 30.9 (2.9) | 14.6                     | 28.7 |
| AD_10   | 155.9 (5.5)                                        | 13.2 (1.6)    | 51.2 (3.7) | 8.5                      | 32.8 |
| AD_11   | 82.4 (4.3)                                         | 14.7 (1.7)    | 12.1 (1.6) | 17.8                     | 14.7 |
| AD_12   | 127.2 (4.8)                                        | 29.8 (2.3)    | 14.5 (1.7) | 23.4                     | 11.4 |
| AD_13   | 242 (6.8)                                          | 44.2 (2.8)    | 18.4 (1.9) | 18.3                     | 7.6  |
| AD_14   | 64.6 (3.4)                                         | 9.5 (1.3)     | 12.8 (1.5) | 14.7                     | 19.8 |
| AD_15   | 206.5 (6.4)                                        | 40.5 (2.8)    | 18.5 (2.2) | 19.6                     | 9.0  |
| AD_16   | 117.2 (4.8)                                        | 16.6 (1.8)    | 10.1 (1.6) | 14.2                     | 8.6  |
| AD_17   | 126.5 (4.9)                                        | 15.7 (1.7)    | 40.2 (3.3) | 12.4                     | 31.8 |
| AD_18   | 59.5 (3.4)                                         | 9.5 (1.4)     | 9.8 (1.6)  | 16.0                     | 16.5 |
| AD_19   | 103.9 (4.5)                                        | 11.1 (1.5)    | 32.4 (2.6) | 10.7                     | 31.2 |
| AD_20   | 110.7 (5.5)                                        | 15.8 (1.7)    | 11.8 (1.5) | 14.3                     | 10.7 |
| AD_21   | 67.1 (3.6)                                         | 13.1 (1.6)    | 14.1 (1.7) | 19.5                     | 21.0 |
| AD_22   | 126.7 (5.1)                                        | 12.4 (1.6)    | 17 (2.1)   | 9.8                      | 13.4 |
| AD_23   | 120.8 (5.6)                                        | 17 (1.8)      | 23.5 (2.5) | 14.1                     | 19.5 |
| AD_24   | 89.2 (4.8)                                         | 13.5 (1.6)    | 7.1 (1.4)  | 15.1                     | 8.0  |
| AD_25   | 104.9 (5.2)                                        | 17.2 (1.8)    | 15.4 (2.1) | 16.4                     | 14.7 |
| AD_26   | 261.8 (8.4)                                        | 40 (2.8)      | 15 (2)     | 15.3                     | 5.7  |
| AD_27   | 29.9 (2.8)                                         | 5.7 (1.1)     | 1.7 (0.7)  | 19.1                     | 5.7  |
| AD_28   | 142.8 (5.1)                                        | 33.5 (2.5)    | 17.3 (2.1) | 23.5                     | 12.1 |
| AD_29   | 57.6 (3.4)                                         | 9.4 (1.4)     | 12.3 (1.6) | 16.3                     | 21.4 |
| Ctrl_1  | 121.5 (4.9)                                        | 12.1 (1.6)    | 7.4 (1.2)  | 10.0                     | 6.1  |
| Ctrl_2  | 141.4 (5.2)                                        | 13.8 (1.6)    | 10.6 (1.7) | 9.8                      | 7.5  |
| Ctrl_3  | 185.1 (5.9)                                        | 28.7 (2.4)    | 11.1 (1.5) | 15.5                     | 6.0  |
| Ctrl_4  | 205.6 (6.4)                                        | 27.7 (2.3)    | 15.1 (1.7) | 13.5                     | 7.3  |
| Ctrl_5  | 210.9 (6.1)                                        | 33.2 (2.5)    | 6 (1.1)    | 15.7                     | 2.8  |
| Ctrl_6  | 144.5 (5.1)                                        | 21.3 (2)      | 13.5 (1.6) | 14.7                     | 9.3  |
| Ctrl_7  | 265.9 (7.2)                                        | 25.6 (2.2)    | 7.2 (1.2)  | 9.6                      | 2.7  |
| Ctrl_8  | 177.9 (5.9)                                        | 18 (1.9)      | 24.9 (2.3) | 10.1                     | 14.0 |
| Ctrl_9  | 292 (7.6)                                          | 24.7 (2.2)    | 21.2 (2.4) | 8.5                      | 7.3  |
| Ctrl_10 | 186.3 (6.1)                                        | 24.8 (2.2)    | 13.5 (1.9) | 13.3                     | 7.2  |
| Ctrl_11 | 156.8 (5.3)                                        | 23.1 (2)      | 9.9 (1.4)  | 14.7                     | 6.3  |
| Ctrl_12 | 208.6 (6.3)                                        | 29.8 (2.4)    | 21.8 (2.1) | 14.3                     | 10.5 |
| Ctrl_13 | 114 (4.8)                                          | 11.2 (1.5)    | 21.4 (2.1) | 9.8                      | 18.8 |
| Ctrl_14 | 266.4 (7.5)                                        | 28.4 (2.4)    | 18.3 (2)   | 10.7                     | 6.9  |
| Ctrl_15 | 307.2 (8)                                          | 38.3 (2.7)    | 41.1 (3.4) | 12.5                     | 13.4 |
| Ctrl_16 | 182 (6)                                            | 18.1 (1.9)    | 8.5 (1.5)  | 9.9                      | 4.7  |
